# Supplementary material for: Metabolic Engineering of Shikimic Acid-Producing Corynebacterium glutamicum From Glucose and Cellobiose Retaining Its Phosphotransferase System Function and Pyruvate Kinase Activities
Source: PubMed Central journal article supplement (PMC7511668; doi:10.3389/fbioe.2020.569406), 2020-09-10
Supplement: Data_Sheet_1.pdf [file Data_Sheet_1.pdf]

## Supplementary Material

### 1 Supplementary Data

#### 1.1 Supplementary Figure

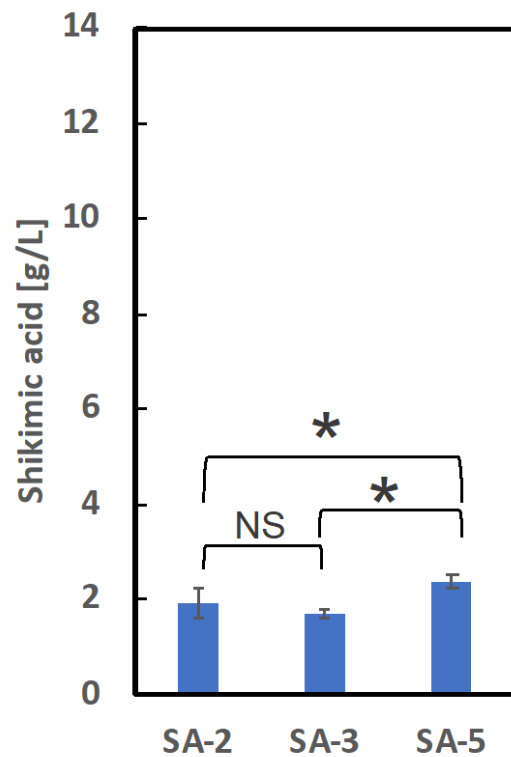

**Supplementary Figure 1.** Culture profiles of strain SA-2, SA-3 and SA-5. The data are presented as the average of three independent experiments, and error bars indicate the standard deviation. P values were computed using the two-tailed Student's t-test (\*,  $P < 0.05$ ).

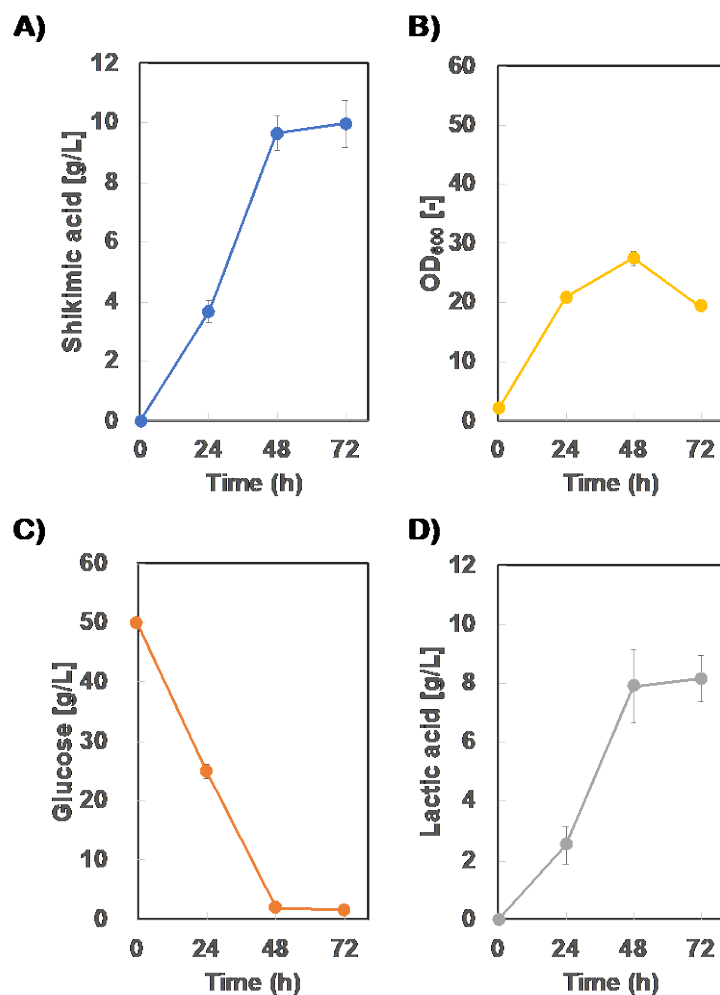

**Supplementary Figure 2.** Culture profiles of strain SA-8. (A) Shikimic acid production, (B) cell growth, (C) glucose consumption, (D) lactic acid accumulation. The data are presented as the average of three independent experiments, and error bars indicate the standard deviation.

## 2 Supplementary table

### 2.1 Supplementary Table S1 Oligonucleotide primers used in this study.

---

| Oligonucleotide primers | Sequence                                   |
|-------------------------|--------------------------------------------|
| $\Delta$ aroK_up_fw     | 5'- CATGATTACGAATTCTTCGATGGACTACAG -3'     |
| $\Delta$ aroK_up_rv     | 5'- GGTTTAATTAATCGCCTCTAAACCTTC -3'        |
| $\Delta$ aroK_down_fw   | 5'- GAAGGTTTAGAGGCGATTAATTAAACC -3'        |
| $\Delta$ aroK_down_rv   | 5'- AGTGCCAAGCTTTGGCTGATTGCC -3'           |
| $\Delta$ qsuD_up_fw     | 5'- CATGATTACGAATTCTGGCGGTGGCTGAA -3'      |
| $\Delta$ qsuD_up_rv     | 5'- CGAGGTTTTACTGACTCCTACTTTTTGAGATTTG -3' |
| $\Delta$ qsuD_down_fw   | 5'- CAAATCTCAAAAAGTAGGAGTCAGTAAAACCTCG -3' |

$\Delta$ qsuD\_down\_rv      5'- GACTCTAGAGGATCCCATCACTTGCTCCCT -3'

$\Delta$ qsuB\_up\_fw      5'- ACATGATTACGAATTCCAGTGTTTCATCATGGGTGCCATTG -3'

$\Delta$ qsuB\_up\_rv      5'- CACGATGCAACTGCTCTTTGGTTTTACTGAGCCGCGAGTTG -3'

$\Delta$ qsuB\_down\_fw      5'- CGGCTCAGTAAAACCAAAGAGCAGTTGCATCGTGCAGCAG -3'

$\Delta$ qsuB\_down\_rv      5'- CGACTCTAGAGGATCCCAATGAAATCAACACCCTCAGGTTCCG -3'

$\Delta$ nagD\_up\_fw      5'- ACATGATTACGAATTCGTCCGAGTCCACGATGGTGTGG -3'

$\Delta$ nagD\_up\_rv      5'- GCTGCTCATCTGGTACGTGCACCATTGTCCCTGTTTTGGGC -3'

$\Delta$ nagD\_down\_fw      5'- CAGGGACAATGGTGCACGTACCAGATGAGCAGCAGTTCAC -3'

$\Delta$ nagD\_down\_rv      5'- CGACTCTAGAGGATCCGTGAACTGCTGCTCATCTGGTACGTG -3'

gnd\_S361F\_up\_fw      5'- CTATGACATGATTACGAATTCGTCCATCGCTGCCAA -3'

gnd\_S361F\_up\_rv 5'- GGGTCGACGTCCCAGTTGTTCTCGTCAAAGCCAGCCTTGATCTCGTC -3'

gnd\_S361F\_down\_fw 5'- GCTTTGACGAGAACAACACTGGGACGTGACCCTCGCGACCTCGCTAC -3'

gnd\_S361F\_down\_rv 5'- CGACTCTAGAGGATCCCCGGGTAAAGCTTCAACCT -3'

aroK\_up\_fw 5'- CATGATTACGAATTCGTAATTTCCATTGGT -3'

aroK\_up\_rv 5'- CCAGATAGAGAATTCCTCTAAACCTTCGA -3'

aroK\_down\_fw 5'- TCTGTTGTTCTCGACCGATTAATTAAACCG -3'

aroK\_down\_rv 5'- AGACTCTAGAGGATCCGATCAGTTTCGTAA-3'

P\_aroG\_T\_fw 5'- TCGAAGGTTTAGAGGGAATTCTCTATCTGG -3'

P\_aroG\_T\_rv 5'- CGGTTTAATTAATCGGTCGAGAACAACAGA -3'

Δcg2392\_up\_fw 5'- ACATGATTACGAATTCCTTGAGCACTCGGCGCAAGACGATAG -3'

$\Delta$ cg2392\_up\_rv 5'- GGGATATCAACTGTCCAACCTCATTAGCAATTAGTCCTTCACAG CGTCGAAAACG -3'

$\Delta$ cg2392\_down\_fw 5'- CGCTGTGAAGGACTAATTGCTAATGAGTTGGACAGTTGATATCCCTAAAGAAGTTCTCCC -  
3'

$\Delta$ cg2392\_down\_rv 5'- CGACTCTAGAGGATCCCTCGCTGAGACGGTAAAGATCAGCGGTG -3'

pta\_up\_fw 5'- ACATGATTACGAATTCAATGTGGAGTATGTGAGCGGGGGTTC -3'

pta\_up\_rv 5'- GCTGCTGGCGGCCGCCAGCCTGAACCTTCTCATTGATGACACTTCAG -3'

pta\_down\_fw 5'- GGTTTCAGGCTGGCGGCCGCCAGCAGCATTACCGCTGAACAAGAGCC -3'

pta\_down\_rv 5'- CGACTCTAGAGGATCCGTTGGGTTTCGGGTTAACAGCACAGTC -3'

ldh\_up\_fw 5'- ACATGATTACGAATTCCCGATAAAGCCAGCGCCCATATTT -3'

ldh\_up\_rv 5'- GATTTCATAATCTTGACGCGGCCGCTTTCGATCCCCTTCCTGATTTCCC -3'

ldh\_down\_fw 5'- GATCGAAAGCGGCCGCGTCAAGATTATGAAATCCATCGTCGGCGATG -3'

ldh\_down\_rv 5'- CGACTCTAGAGGATCCGCGATGTCTTCCTCACCGTATTCACCGTG -3'

aroK-H36\_fw 5'- GAATTCTCTATCTGGTGCCCTAAACGGGGG -3'

aroK-term\_re 5'- GTCGAGAACAACAGATAAAAACGAAAGGCC -3'

pta-H36\_fw 5'- AAGGTTTCAGGCTGGCGGCCGCCATTCAGGCTGCGCAACTGTTG -3'

pta-term\_re 5'- ATGCTGCTGGCGGCCGCTGTTATGTGCCTGGCTCCTAATCAAAGCTG -3'

ldh-H36\_fw 5'- AGTGGGATCGAAAGCGGCCGCCATTCAGGCTGCGCAACTGTTG -3'

ldh-term\_re 5'- AATCTTGACGCGGCCGCTGTTATGTGCCTGGCTCCTAATCAAAGCTG -3'

aroG\_fw 5'- GAGTAGCATGGGATCCATGAGTTGGACAGTTGATATCCCTAAAGAAGTTCTCCCTG -3'

aroG\_rv 5'- ACAGCCAAGCCTCGAGTTAGTTACGCAGCATTTCTGCAACGAGGAAAGC -3'

aroB\_fw 5'- GAGTAGCATGGGATCCATGAGCGCAGTGCAGATTTTCAACACCGTC -3'

aroB\_rv 5'- ACAGCCAAGCCTCGAGTTAGTGGCTGATTGCCTCATAAGCACTCTGTAAATCTTG -3'

qsuC\_fw 5'- TAGGAGTAGCATGGGATCCATGCCTGGAAAAATT -3'

qsuC\_rv 5'- CAAAACAGCCAAGCCTCGAGCTACTTTTTGAGATT -3'

aroE1\_fw 5'- GAGTAGCATGGGATCCATGGTCAACTACGTCGACAGGGAAACAACCCTG -3'

aroE1\_rv 5'- ACAGCCAAGCCTCGAGTTACTTGGAGAACTCCTCCGCAGCAATGATCTG -3'

aroE3\_fw 5'- GAGTAGCATGGGATCCATGGGTTCTCACATCACTCACCGGGC -3'

aroE3\_rv 5'- ACAGCCAAGCCTCGAGTTAGTGTTCTTCTGAGATGCCTAAAGACTCTTCCAAAGCCTC -3'

tkt-tal\_fw 5'- GAGTAGCATGGGATCCATGACCACCTTGACGCTGTCACCTG -3'

tkt-tal\_rv 5'- ACAGCCAAGCCTCGAGCTACTTCAGGCGAGCTTCCATGGACTCAAG-3'



pck\_fw 5'- GAGTAGCATGGGATCCATGACTACTGCTGCAATCAGGGGCCTTC-3'

pck\_rv 5'- ACAGCCAAGCCTCGAGTTAAGCGTGAGCTGCTGAAATGCGG-3'

RT-aroG\_fw 5'- TTGCATACGCTGACAAGCTC -3'

RT-aroG\_rv 5'- TGCCTCAACAGCCTGGATAA -3'

RT-aroB\_fw 5'- CTGCGCCTTTACGAAACTGA -3'

RT-aroB\_rv 5'- TGGGAGCCTTCGACTTCTTT -3'

RT-ldh\_fw 5'- GCATACGCATACGCACTGAT -3'

RT-ldh\_rv 5'- CATGACGTTGCCTTCGAGTT -3'

RT-cg3177\_fw 5'- GCATACGCATACGCACTGAT -3'

RT-cg3177\_rv 5'- CATGACGTTGCCTTCGAGTT -3'

---
